# Supplementary material for: Jet fuel range hydrocarbon production by co-pyrolysis of low density polyethylene and wheat straw over an activated carbon catalyst
Source: Royal Society of Chemistry journal article supplement (doi:10.1039/d1se01108a), 2021-01-01
Supplement: d1se01108a1.pdf [file d1se01108a1.pdf]

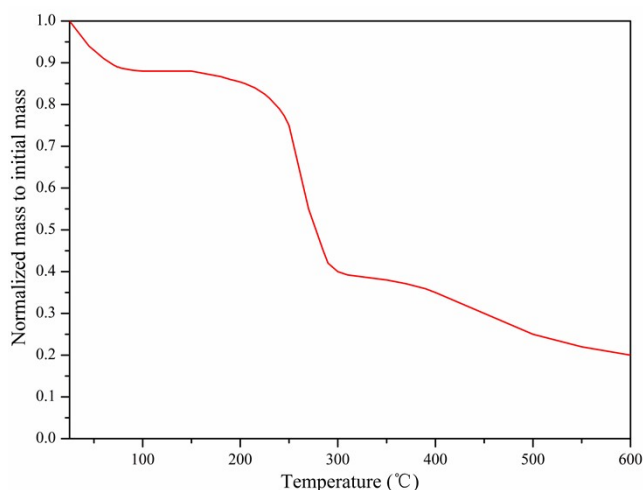

Fig.S1. Thermogravimetric curve of wheat straw (Nitrogen flow rate of 50 ml/min with a ramp of 60 °C/min)

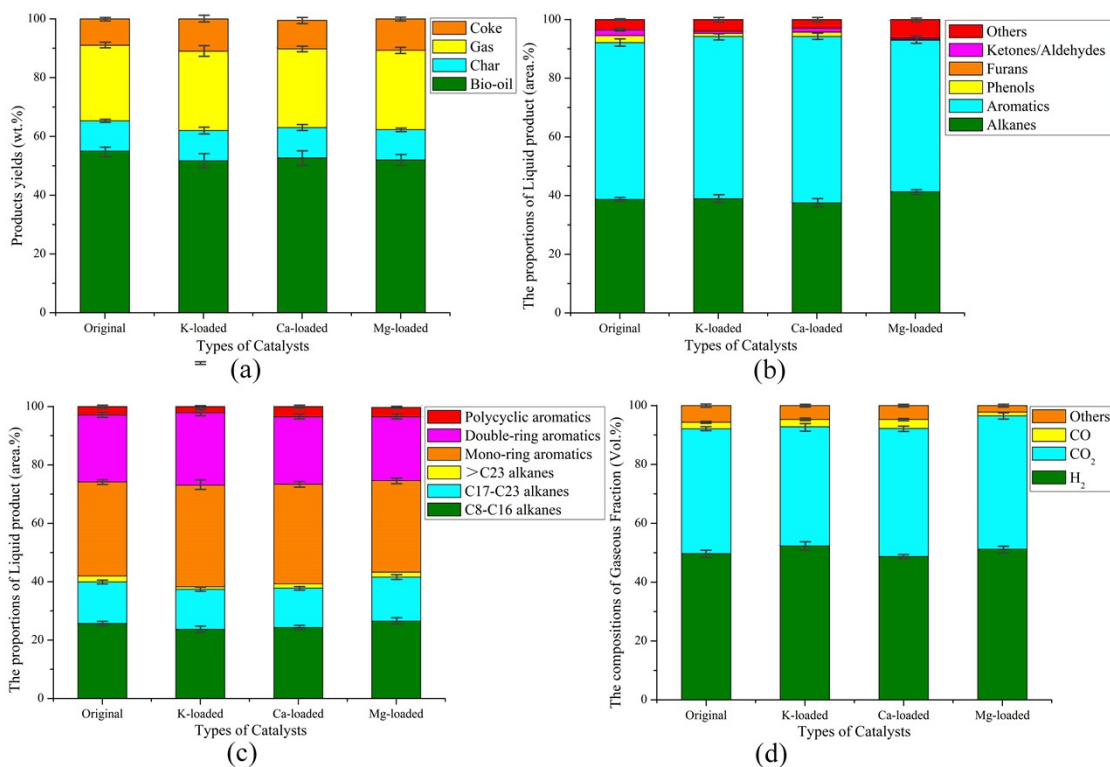

Fig.S2. Products yields (a), compositions of liquid products (b), hydrocarbons (c) and gaseous products (d) over different types of activated carbon catalysts (Temperature = 550°C, Catalyst to feedstock ratio = 1:1 and LDPE to wheat straw ratio = 1:1)
